# Supplementary material for: Immunogenic Evaluation of Ribosomal P-Protein Antigen P0, P1, and P2 and Pentameric Protein Complex P0-(P1-P2)2ofPlasmodium falciparumin a Mouse Model
Source: Hindawi journal article supplement (doi:10.1155/2019/9264217), 2019-09-12
Supplement: f1 [file 9264217.f1.pdf]

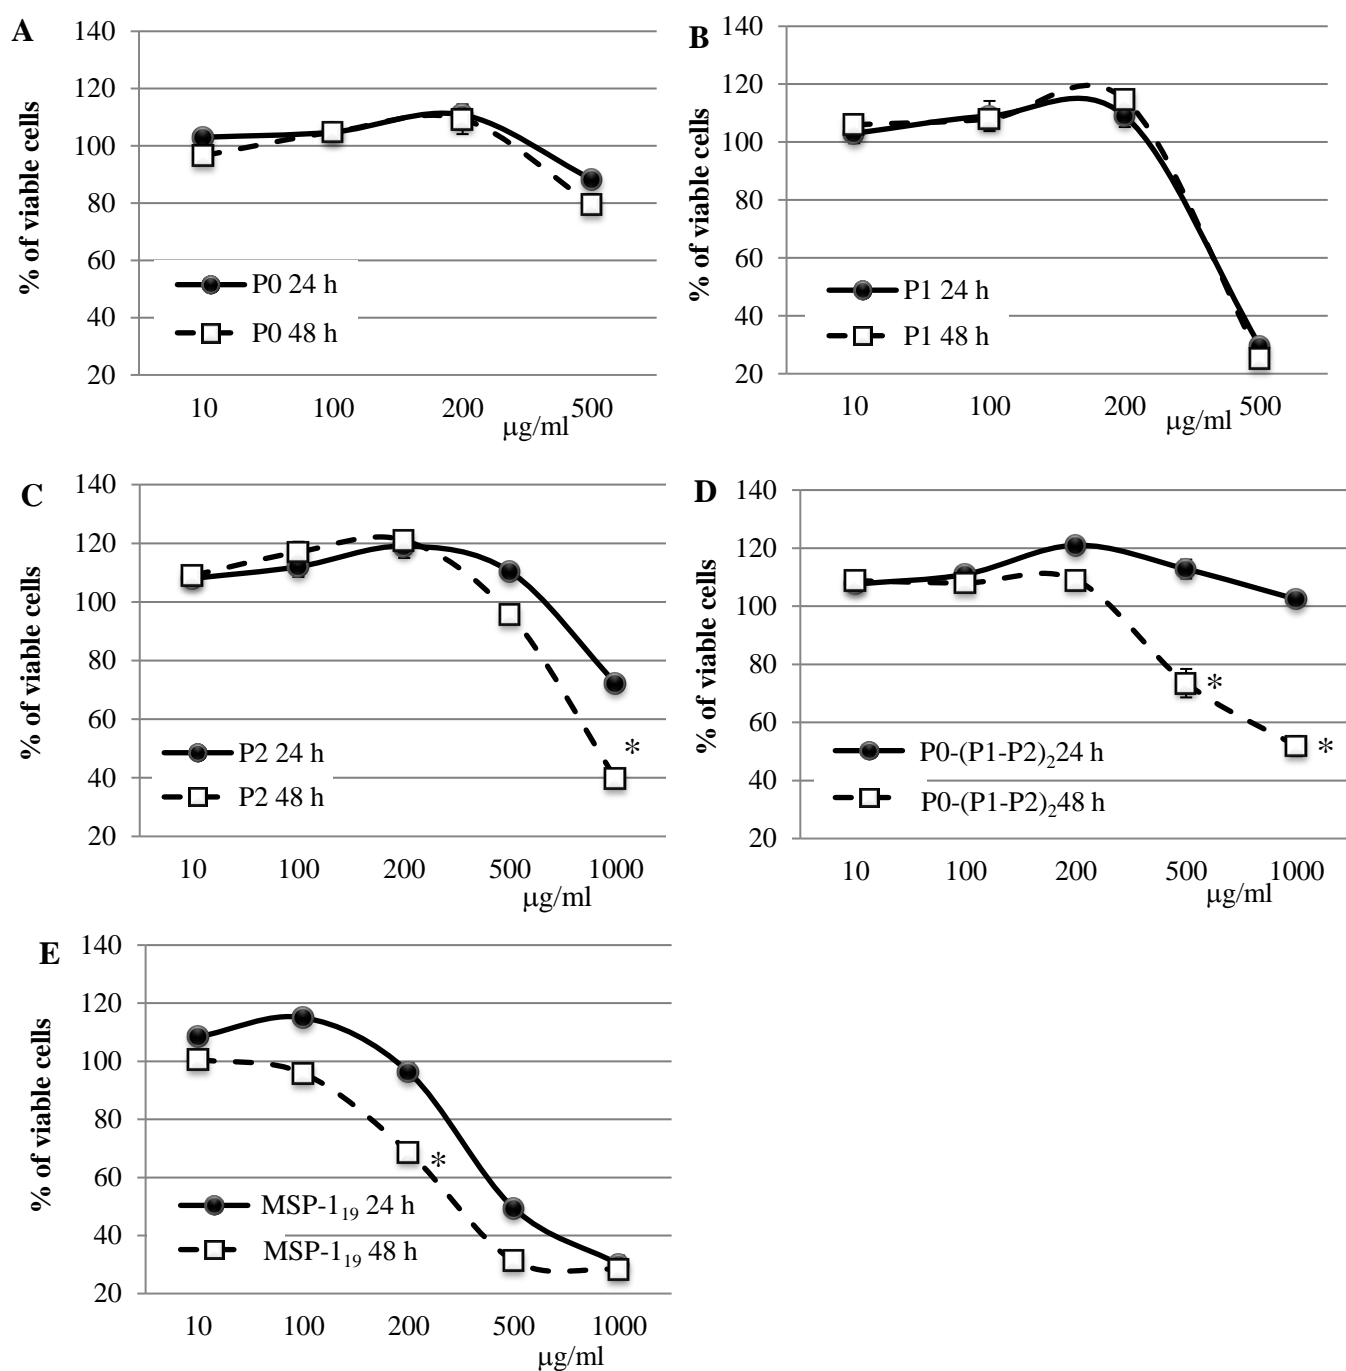

Figure S1.

**Cytotoxicity of recombinant ribosomal P-protein antigens.** The viability of mouse spleen lymphocytes treated for 24-48h with different concentrations of P0 (A), P1 (B), P2 (C), P0-(P1-P2)<sub>2</sub> (D), and Msp-1<sub>19</sub> (E) was determined with the MTT assay. The results are expressed as the mean  $\pm$  S.E.M. of three independent experiments, each with eight separate cultures. \*-significantly different from the 24h incubation time,  $P \leq 0.01$  (Wilcoxon's signed rank test).

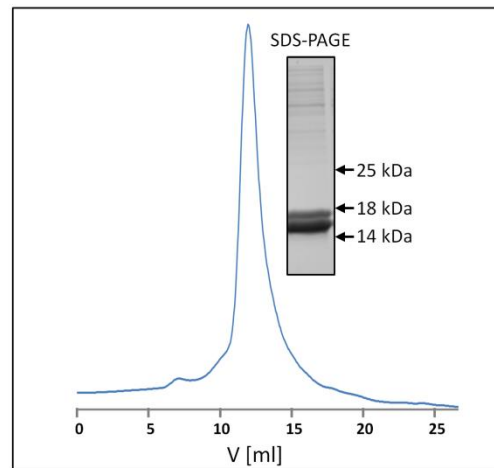

Figure S2.

**Size-exclusion chromatography of the pentameric P-protein complex.** Size-exclusion chromatography was performed using an analytical gel filtration column; the complex was eluted as a single symmetrical peak. Insert; SDS-PAGE analysis of protein fraction isolated from size-exclusion chromatography.

| Mice treated with       | Th1 versus Tc |          |
|-------------------------|---------------|----------|
|                         | r             | <i>P</i> |
| P0                      | 0.14          | 0.57     |
| P1                      | 0.62          | 0.005    |
| P2                      | 0.69          | 0.001    |
| P0-(P1-P2) <sub>2</sub> | 0.92          | 0.0003   |
| Msp-1 <sub>19</sub>     | 0.91          | 0.0001   |
| adjuvant control mice   | 0.14          | 0.58     |
| untreated control mice  | 0.22          | 0.41     |

Table S1.

**Th1 lymphocytes support cellular immune response.** The Spearman correlation between the number of the Th1 and Tc lymphocytes in the peripheral blood of mice immunized with the P0, P1, P2, P0-(P1-P2)<sub>2</sub>, and MSP-1<sub>19</sub> proteins and in the adjuvant control mice as well as the untreated control mice. Each group consisted of eighteen mice. Values of  $P \leq 0.05$  were considered significant.

| Protein                   | CD4+CD25+ versus: |       |        |         | CD4+FoxP3+ versus: |        |       |       |
|---------------------------|-------------------|-------|--------|---------|--------------------|--------|-------|-------|
|                           | Tc                |       | Th1    |         | Tc                 |        | Th1   |       |
|                           | r                 | P     | r      | P       | r                  | P      | r     | P     |
| P0                        | -0.046            | 0.85  | 0.13   | 0.59    | 0.17               | 0.49   | 0.2   | 0.42  |
| P1                        | -0.15             | 0.55  | -0.13  | 0.56    | 0.31               | 0.2    | 0.3   | 0.22  |
| P2                        | -0.38             | 0.11  | -0.82  | 0.00003 | -0.63              | 0.004  | -0.68 | 0.001 |
| P0-(P1-P2) <sub>2</sub>   | -0.46             | 0.053 | -0.49  | 0.039   | -0.71              | 0.0008 | -0.65 | 0.003 |
| Msp1 <sub>19</sub>        | -0.43             | 0.07  | -0.054 | 0.02    | -0.56              | 0.01   | -0.48 | 0.04  |
| adjuvant<br>control mice  | 0.28              | 0.24  | -0.079 | 0.75    | 0.12               | 0.37   | -0.1  | 0.62  |
| untreated<br>control mice | 0.3               | 0.11  | 0.1    | 0.66    | 0.26               | 0.21   | 0.15  | 0.54  |

Table S2.

**Regulation of cellular response (blood lymphocytes).** The Spearman correlation between the numbers of CD4+CD25+ or CD4+FoxP3+ versus Tc and Th1 lymphocytes in the peripheral blood of mice immunized with the P0, P1, P2, P0-(P1-P2)<sub>2</sub>, and Msp-1<sub>19</sub> proteins and in the adjuvant control mice as well as the untreated control mice. Correlations were calculated in each study group with eighteen mice. Values of  $P \leq 0.05$  were considered significant.

| Protein                   | CD4+FoxP3+ versus: |       |       |       |
|---------------------------|--------------------|-------|-------|-------|
|                           | Tc                 |       | Th1   |       |
|                           | r                  | P     | r     | P     |
| P0                        | 0.45               | 0.22  | 0.31  | 0.4   |
| P1                        | -0.016             | 0.96  | -0.26 | 0.48  |
| P2                        | -0.72              | 0.02  | 0.38  | 0.3   |
| P0-(P1-P2) <sub>2</sub>   | -0.81              | 0.007 | -0.85 | 0.003 |
| Msp-1 <sub>19</sub>       | -0.76              | 0.017 | -0.4  | 0.28  |
| adjuvant<br>control mice  | 0.02               | 0.94  | 0.36  | 0.32  |
| untreated<br>control mice | 0.12               | 0.84  | 0.22  | 0.61  |

Table S3.

**Regulation of cellular response (spleen lymphocytes).** The Spearman correlation between the numbers of CD4+FoxP3+ versus Tc and Th1 lymphocytes in cells isolated from the spleen of mice immunized with the P0, P1, P2, P0-(P1-P2)<sub>2</sub>, and Msp-1<sub>19</sub> proteins and in the adjuvant control mice. Correlations were calculated in each study group with eighteen mice. Values of  $P \leq 0.05$  were considered significant.

| Mice treated with       | TGF- $\beta$ versus: |       |            |       | IL-10 versus: |       |            |       |
|-------------------------|----------------------|-------|------------|-------|---------------|-------|------------|-------|
|                         | CD4+CD25+            |       | CD4+FoxP3+ |       | CD4+CD25+     |       | CD4+FoxP3+ |       |
|                         | r                    | P     | r          | P     | r             | P     | r          | P     |
| P0                      | -0.2                 | 0.59  | 0.5        | 0.07  | -             | -     | -          | -     |
| P1                      | 0.35                 | 0.34  | 0.7        | 0.01  | 0.61          | 0.076 | 0.81       | 0.007 |
| P2                      | 0.7                  | 0.03  | 0.8        | 0.001 | 0.44          | 0.23  | 0.72       | 0.025 |
| P0-(P1-P2) <sub>2</sub> | 0.82                 | 0.005 | 0.51       | 0.01  | 0.66          | 0.049 | 0.5        | 0.16  |
| Msp-1 <sub>19</sub>     | 0.88                 | 0.002 | 0.55       | 0.05  | 0.45          | 0.21  | 0.55       | 0.17  |
| adjuvant control mice   | -0.15                | 0.49  | 0.1        | 0.61  | 0.11          | 0.33  | 0.2        | 0.21  |
| untreated control mice  | -0.1                 | 0.59  | -0.19      | 0.69  | 0.17          | 0.84  | 0.11       | 0.66  |

Table S4.

**Interplay between regulatory blood lymphocytes and TGF- $\beta$  or IL-10.** The Spearman correlation between the numbers of serum TGF- $\beta$  or IL-10 and CD4+CD25+ or CD4+FoxP3+ lymphocytes in the peripheral blood of mice immunized with the P0, P1, P2, P0-(P1-P2)<sub>2</sub>, and Msp-1<sub>19</sub> proteins and in the adjuvant control mice. Correlations were calculated in each study group with eighteen mice. Values of  $P \leq 0.05$  were considered significant.

- the concentrations of circulating IL-10 levels in mice immunized with the P0 protein were below the detection threshold; therefore, calculation of Spearman correlations was not possible

| Mice treated with       | Th2 versus IL-10 |          |
|-------------------------|------------------|----------|
|                         | r                | <i>P</i> |
| P0                      | -                | -        |
| P1                      | 0.49             | 0.18     |
| P2                      | 0.65             | 0.05     |
| P0-(P1-P2) <sub>2</sub> | 0.82             | 0.006    |
| Msp-1 <sub>19</sub>     | 0.81             | 0.007    |
| adjuvant control mice   | 0.15             | 0.54     |
| untreated control mice  | 0.21             | 0.41     |

Table S5.

**Production of IL-10 is associated with increased Th2 lymphocyte numbers.** The Spearman correlation between the numbers of serum IL-10 and Th2 (CD4+CD30+) lymphocytes in the peripheral blood of mice immunized with the P0, P1, P2, P0-(P1-P2)<sub>2</sub>, and Msp-1<sub>19</sub> proteins and in the adjuvant as well as the untreated control mice. Correlations were calculated in each study group with eighteen mice. Values of  $P \leq 0.05$  were considered significant.

- the concentrations of circulating IL-10 levels in mice immunized with the P0 protein were below the detection threshold; therefore, calculation of Spearman correlations was not possible

| Mice treated with       | total IgG versus Th2 |          |
|-------------------------|----------------------|----------|
|                         | r                    | <i>P</i> |
| P0                      | 0.65                 | 0.056    |
| P1                      | 0.37                 | 0.33     |
| P2                      | 0.68                 | 0.04     |
| P0-(P1-P2) <sub>2</sub> | 0.91                 | 0.0006   |
| Msp-1 <sub>19</sub>     | 0.89                 | 0.001    |
| adjuvant control mice   | 0.21                 | 0.26     |
| untreated control mice  | 0.2                  | 0.33     |

Table S6.

**Humoral immune response support.** The Spearman correlation between the IgG levels and the abundance of Th2 lymphocytes in the peripheral blood of mice immunized with the P0, P1, P2, P0-(P1-P2)<sub>2</sub>, and Msp-1<sub>19</sub> proteins. For IgG determination, sera in each mouse group were pooled (n=9). Values of  $P \leq 0.05$  were considered significant.



| Mice<br>immunized<br>with | IL-10 versus: |        |      |       |
|---------------------------|---------------|--------|------|-------|
|                           | total IgG     |        | Th2  |       |
|                           | r             | P      | r    | P     |
| P0                        | -             | -      | -    | -     |
| P1                        | 0.96          | 0.0004 | 0.49 | 0.18  |
| P2                        | 0.95          | 0.0006 | 0.65 | 0.057 |
| P0-(P1-P2) <sub>2</sub>   | 0.69          | 0.037  | 0.82 | 0.006 |
| Msp-1 <sub>19</sub>       | 0.66          | 0.049  | 0.82 | 0.007 |
| adjuvant<br>control mice  | 0.19          | 0.29   | 0.22 | 0.39  |
| untreated<br>control mice | 0.09          | 0.39   | 0.28 | 0.43  |

Table S7.

**IL-10 promotes humoral response.** The Spearman correlation between IgG levels versus IL-10 serum concentrations and Th2 lymphocyte numbers in the peripheral blood of mice immunized with the P0, P1, P2, P0-(P1-P2)<sub>2</sub>, and MSP-1<sub>19</sub> proteins and in the adjuvant control mice as well as the untreated control mice. For measurements of both IgG and IL-10, sera in each mice group were pooled (n=9). P0 did not induce detectable production of serum IL-10. Values of  $P \leq 0.05$  were considered significant.
